# Supplementary material for: Rhes travels from cell to cell and transports Huntington disease protein via TNT-like protrusion
Source: PubMed Central journal article supplement — J Cell Biol. 2019 May 10;218(6):1972–93. doi: 10.1083/jcb.201807068 (PMC6548131; doi:10.1083/jcb.201807068), 2019-05-10
Supplement: JCB_201807068_sm.pdf [file JCB_201807068_sm.pdf]

## Supplemental material

Sharma et al., <https://doi.org/10.1083/jcb.201807068>

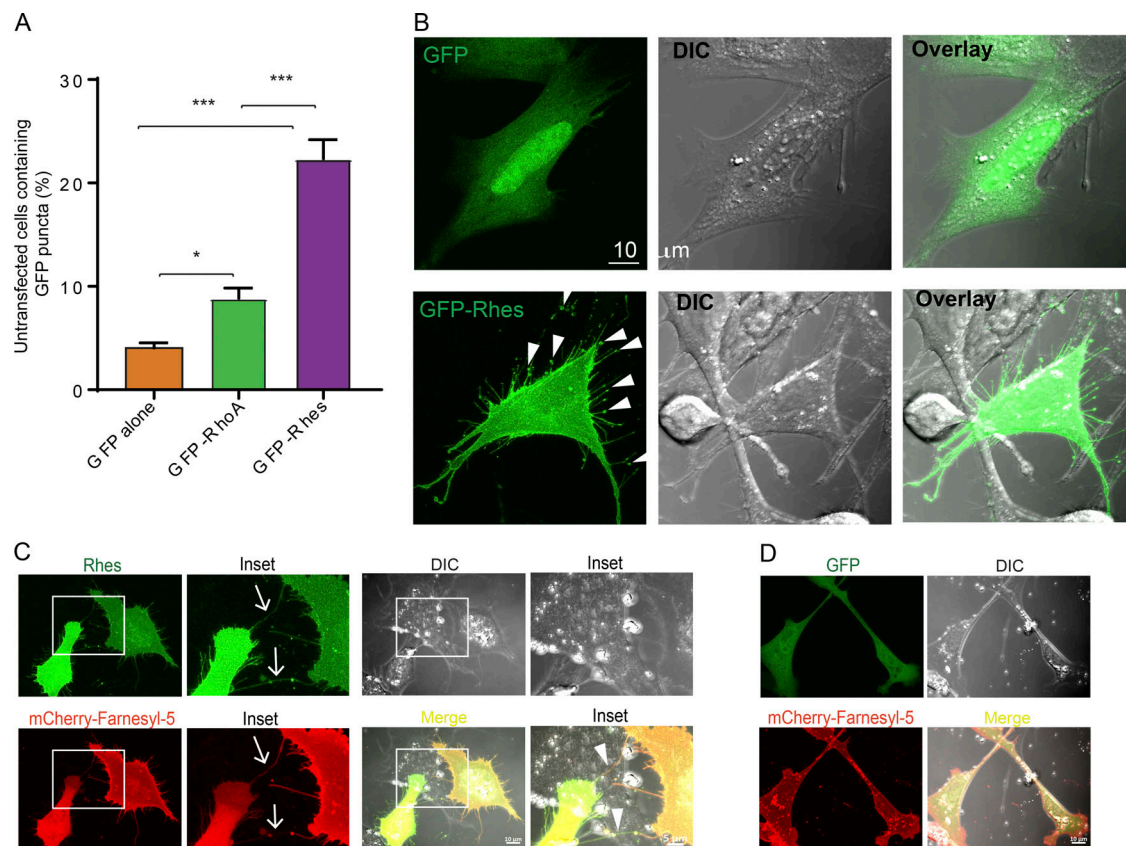

**Figure S1. Rhes induces TNT-like cellular protrusions, Rhes tunnels. (A)** Quantification of untransfected cells (%) containing GFP puncta from GFP ( $4.01 \pm 1.80$ ) or GFP-RhoA ( $8.84 \pm 3.49$ ) or GFP-Rhes ( $22.3 \pm 6.43$ ) transfected cells. Data are normalized to number of transfected cells and total number of cells (transfected and untransfected) per field. Bar graph shows mean  $\pm$  SEM, one-way ANOVA (\*,  $P < 0.05$ ; \*\*\*,  $P < 0.001$ ). GFP ( $n = 205$ ), GFP-RhoA ( $n = 211$ ), and GFP-Rhes ( $n = 207$ ), total 12 fields/group. **(B)** Confocal and bright field (DIC) image of striatal neuronal cells expressing GFP alone (upper panel) or GFP-Rhes (lower panel). Arrowheads indicate Rhes-induced filopodia, with vesicles at their tip, similar to cytoneme in *Drosophila*, or TNTs in PC12, that are absent in GFP alone. **(C and D)** Confocal and bright field (DIC) image of striatal neuronal cells coexpressing GFP-Rhes (C) or GFP alone (D) with membrane marker mCherry-Farnesyl 5. Insets are shown at higher magnification with each panel. Arrows indicate Rhes-induced cellular protrusions that were absent in GFP alone-expressing cells.

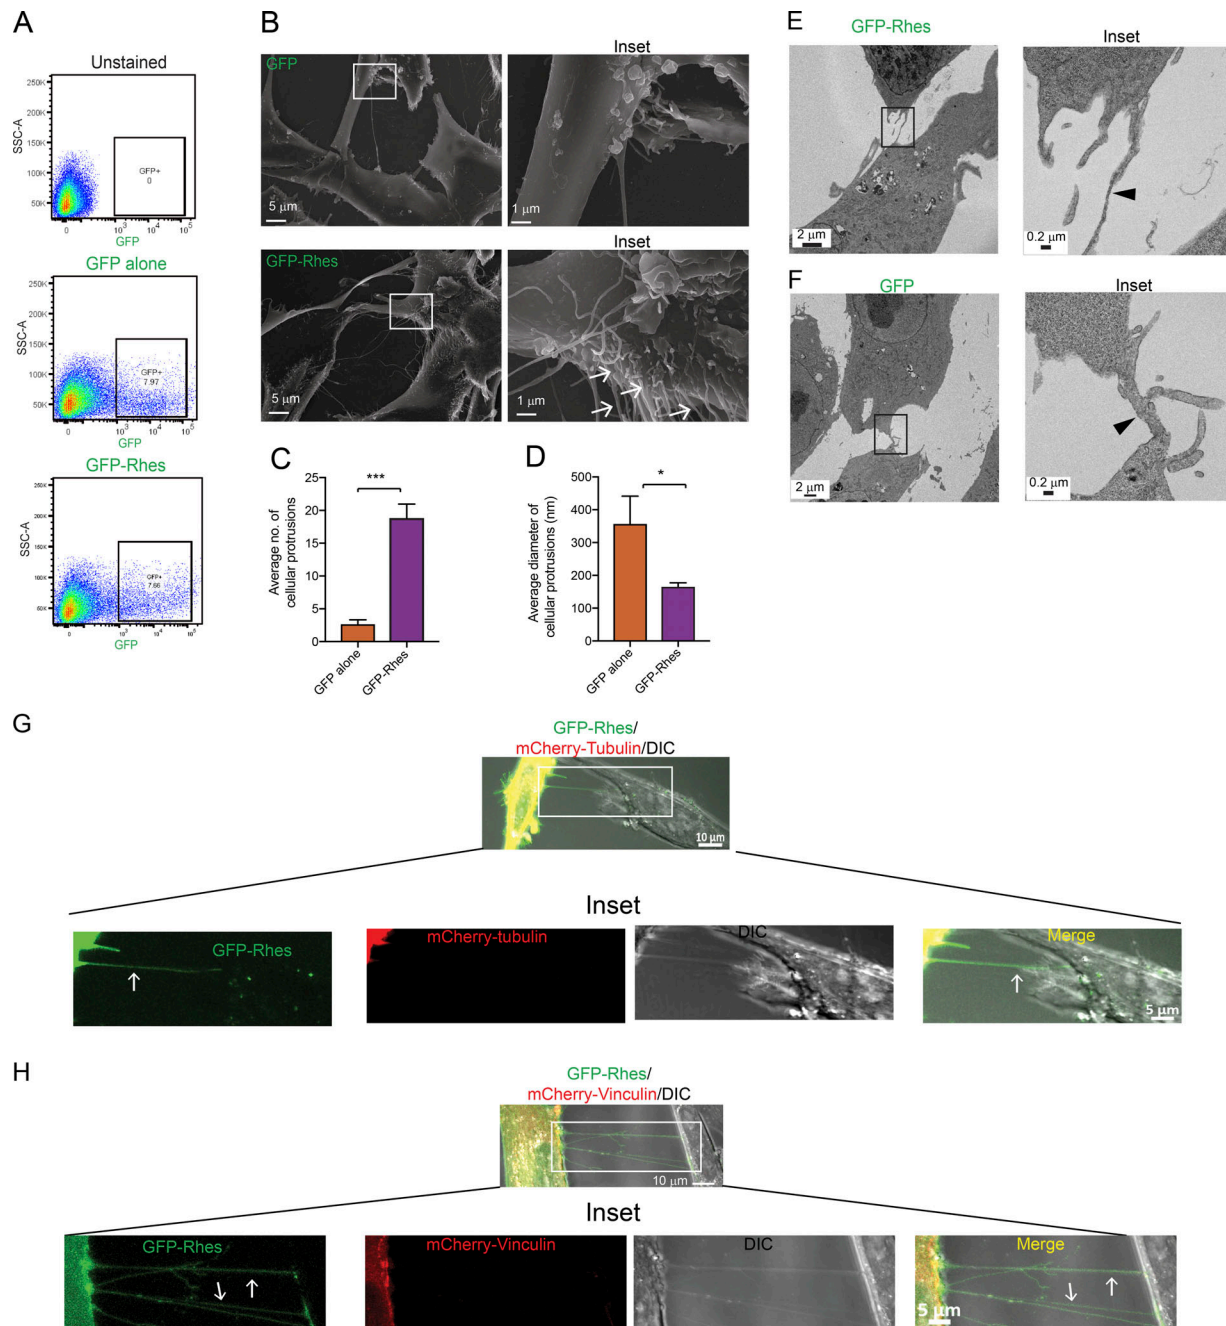

**Figure S2. Scanning EM and TEM images for Rhes-induced TNT-like cell protrusions and Rhes transportation to a neighboring cell.** (A) Representation of FACS plot of striatal neuronal cells sorted for unstained, GFP alone, or GFP-Rhes, and that were subsequently cultured for EM analysis. (B) Scanning EM images from FACS-sorted GFP alone or GFP-Rhes. Inset shows the boxed area at higher magnification. Arrows indicate numerous cellular protrusions in GFP-Rhes. (C) Bar graph represents quantification of average number of cellular protrusions per cell for GFP ( $2.72 \pm 1.47$ ) and GFP-Rhes ( $18.86 \pm 5.16$ ). (D) Bar graph shows the quantification of average diameter of cellular protrusions per cell or GFP ( $358.33 \pm 203.51$ ) and GFP-Rhes ( $166.67 \pm 25.81$ ) using scanning EM images. Data mean  $\pm$  SEM; unpaired *t* test (\*,  $P < 0.05$ ; \*\*\*,  $P < 0.001$ ; GFP:  $n = 15$  cells; GFP-Rhes:  $n = 13$  cells). (E and F) Rhes-induced TNT-like cell protrusions are negative for tubulin and vinculin. Representative TEM images from FACS-sorted GFP-Rhes (E) or GFP alone (F)-expressing cells. Magnified images are shown in insets from selected areas. Arrowheads indicate cellular protrusions that in GFP-Rhes are  $<150$  nm and in GFP alone are  $>200$  nm in diameter. (G) Confocal and bright field (DIC) image of striatal neuronal cells coexpressing GFP-Rhes and mCherry-Tubulin. Arrows indicate a Rhes-induced TNT-like process. (H) Confocal and bright field (DIC) image of striatal neuronal cells coexpressing GFP-Rhes and mCherry-Vinculin. Arrows show Rhes-induced TNT-like protrusions. Inset shows the boxed area at higher magnification.

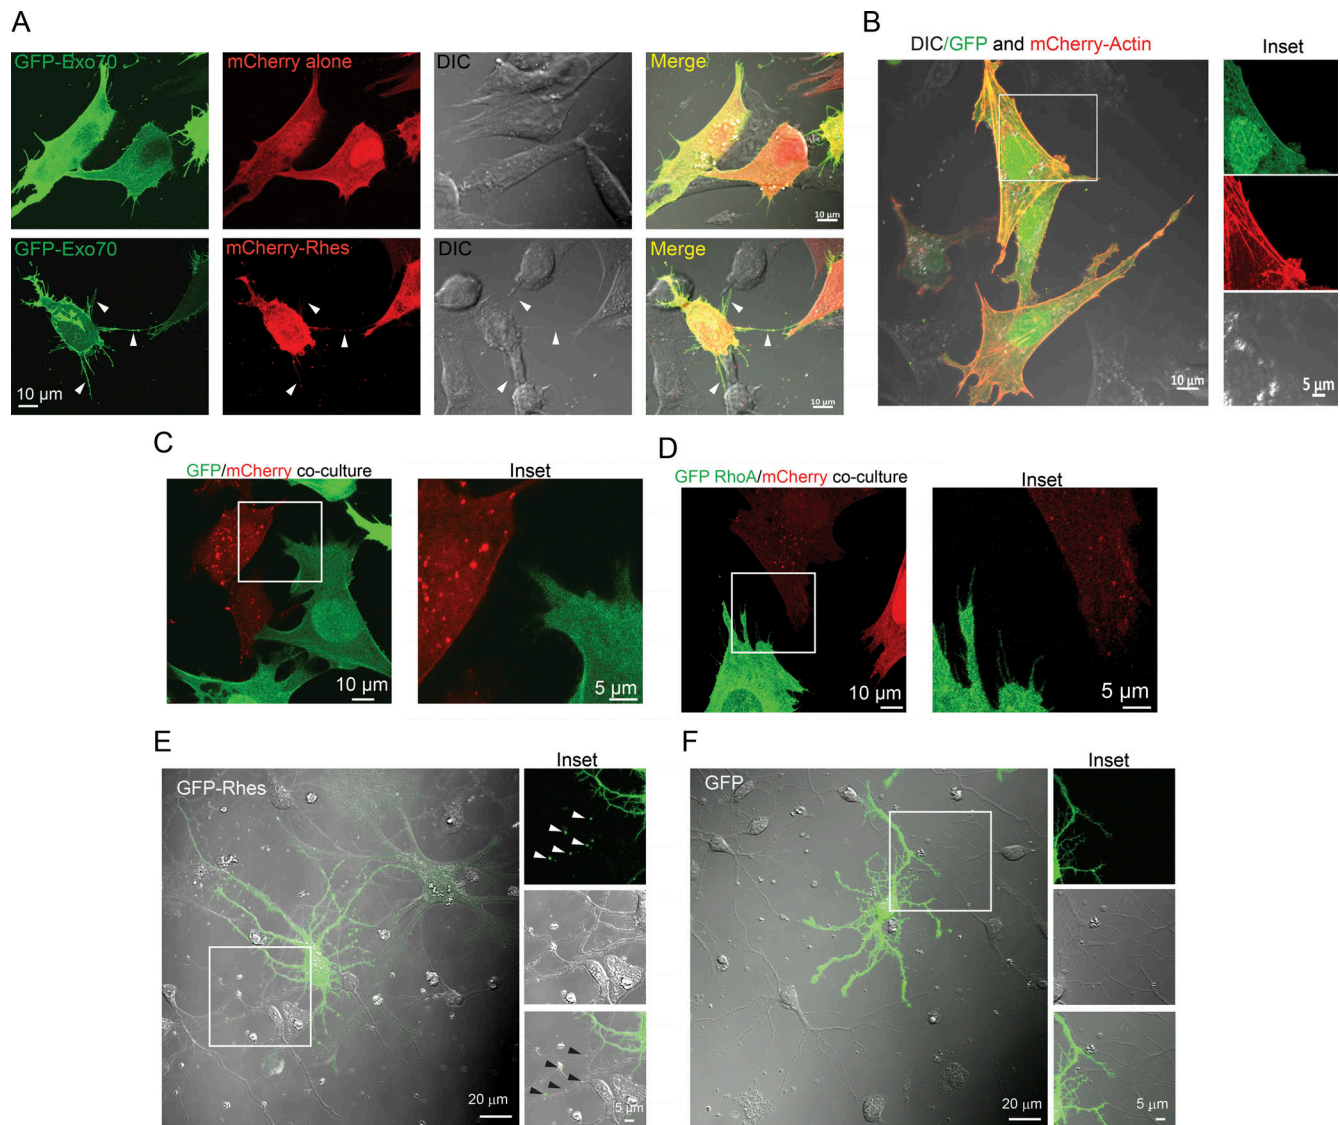

**Figure S3. Rhes-induced TNT-like cell protrusions are positive for Exo70.** (A) Confocal and bright field (DIC) image of striatal neuronal cells coexpressing mCherry alone or mCherry-Rhes with GFP-Exo70. Arrowheads indicate Rhes-induced TNT-like protrusions. (B) Representative confocal and DIC image of striatal neuronal cells coexpressing GFP alone and mCherry-Actin. Inset shows the boxed area at higher magnification. (C and D) FACS-sorted GFP (C) or GFP-RhoA (D) expressing striatal neuronal cells (green) were co-cultured with FACS-sorted mCherry cells (red). Magnified images are shown in inset from selected area. GFP-Rhes expressing primary striatal neurons show numerous puncta in the neighboring cells. (E and F) Representative confocal and bright field DIC image of primary striatal neuronal cells, transfected with GFP-Rhes (E) or GFP (F). Insets are shown at higher magnification within each panel. Arrowheads indicate GFP-Rhes puncta in the neighboring untransfected primary striatal neuron, but no such puncta were observed in GFP control cells.

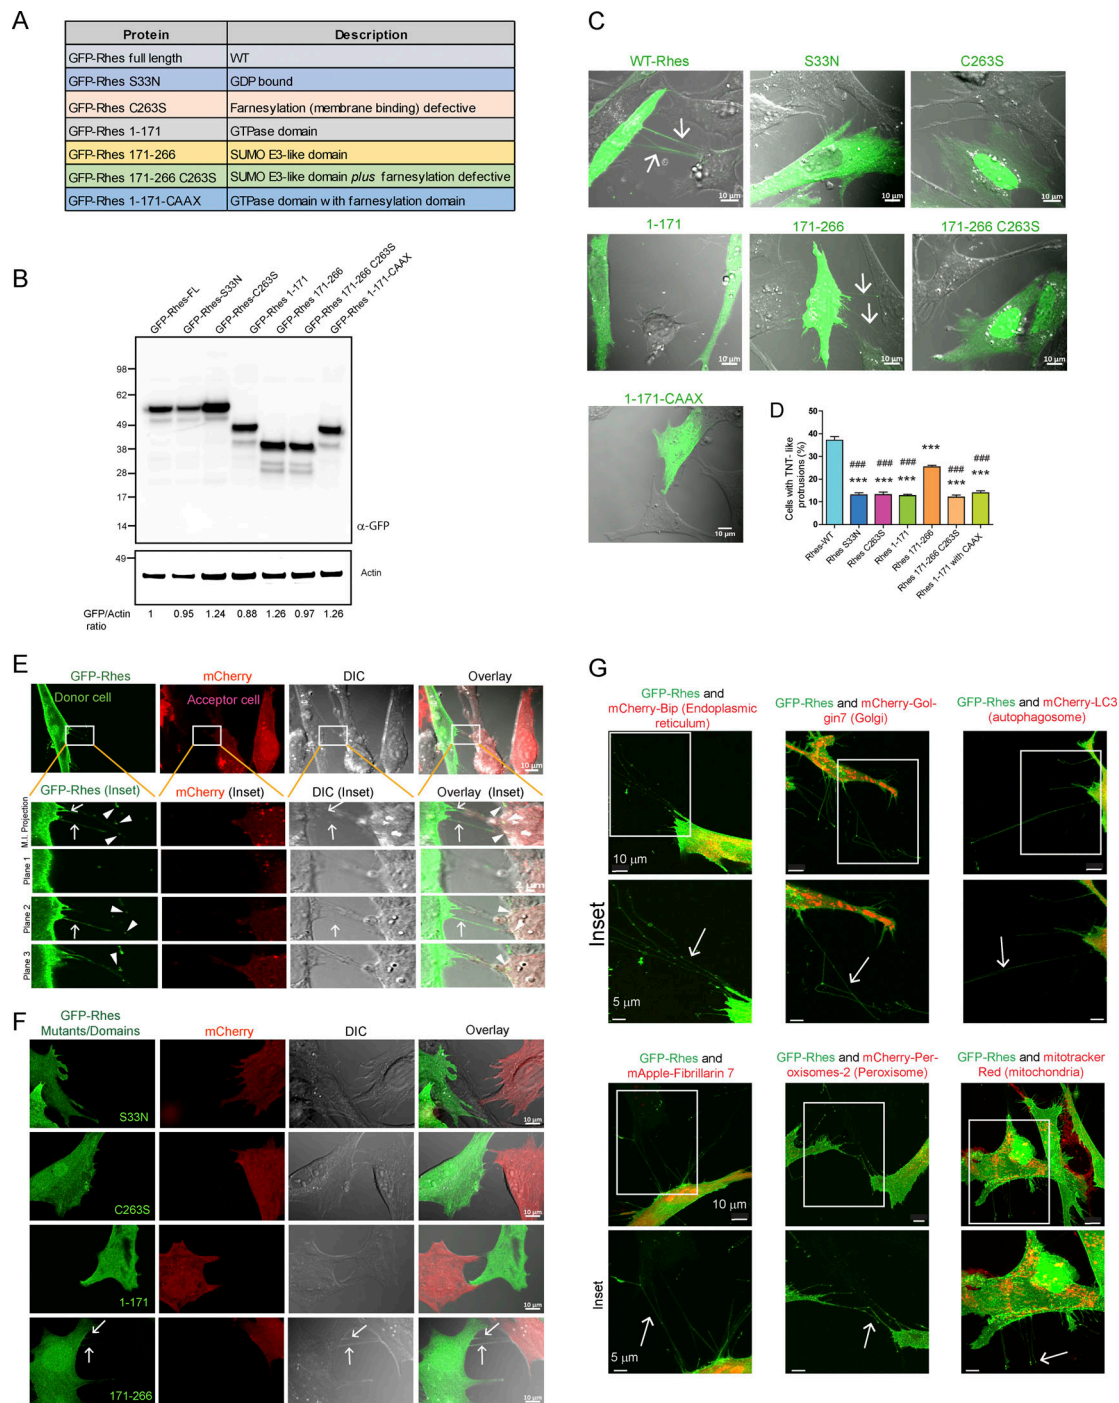

**Figure S4. The role of Rhes domain/mutants in production of Rhes-induced TNT-like cell protrusions. (A)** Rhes domains and Rhes mutants. **(B)** Western blot showing the expression of full-length GFP-Rhes WT or mutants or GFP-Rhes domains in striatal neuronal cells after 48 h of transfection. Membrane was blotted for anti-GFP antibody. Actin was used for loading control. GFP/Actin ratio was calculated by ImageJ software. **(C)** Representative confocal image of striatal neuronal cells expressing either GFP-tagged Rhes WT or its mutants. Arrows indicate TNT-like processes. **(D)** Quantification of the cells (%) with TNT-like protrusions for C. Bar graph shows mean  $\pm$  SEM; one-way ANOVA (\*\*\*,  $P < 0.001$  compared with Rhes-FL; ###,  $P < 0.001$  compared with Rhes 171-266). Data were quantified from four independent experiments,  $n = >200$  cells/group. Cells exhibiting TNT-like protrusions more than 10  $\mu$ m in length and  $<200$  nm in diameter are included in quantification. Rhes WT ( $37.09 \pm 3.43$ ), Rhes S33N ( $13.03 \pm 1.79$ ), Rhes C263S ( $13.12 \pm 2.36$ ), Rhes 1-171 ( $12.68 \pm 1.28$ ), Rhes 171-266 ( $25.34 \pm 1.40$ ), Rhes 171-266 C263S ( $12.00 \pm 2.01$ ), and Rhes 1-171-CAAX ( $13.85 \pm 1.99$ ). **(E and F)** Assessment of various organelle markers in Rhes tunnels. Representative confocal and DIC image of FACS-sorted GFP-Rhes (E) or its mutants or domains (F) expressing striatal neuronal cells (donor cells) co-cultured with FACS-sorted mCherry cells (acceptor cells). Arrowheads indicate GFP-Rhes-positive vesicles in mCherry-expressing cells at different planes. Arrows indicate TNT-like protrusions induced by either GFP-Rhes or GFP-Rhes 171-266. **(G)** Representative confocal images of striatal neuronal cells expressing GFP-Rhes (green) and mCherry tagged (red) with the indicated cell organelle marker. Arrows indicate Rhes-induced TNT-like processes. For mitochondria staining, mitotracker was added after 48 h of GFP-Rhes transfection at 200 nM concentration, incubated at 37°C for 30 min, and imaged using confocal microscopy. Inset shows the boxed area at higher magnification.

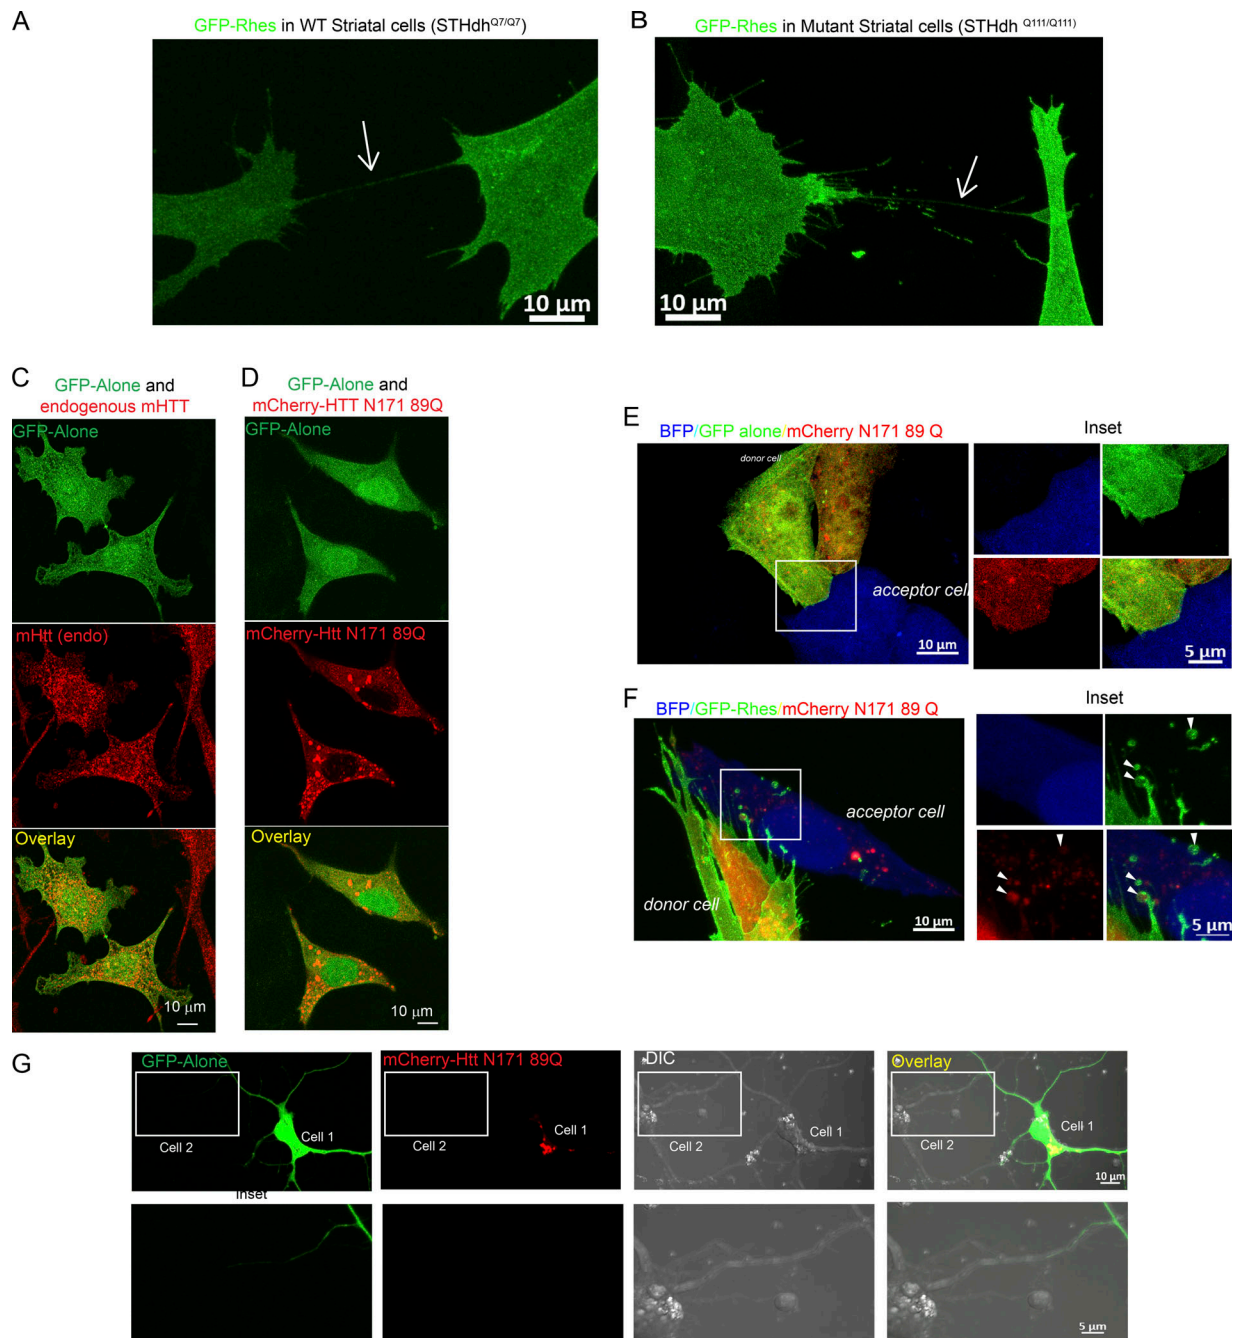

Figure S5. **mHTT N171-89Q transportation via Rhes-induced TNT-like Rhes tunnels.** **(A and B)** Representative confocal image of (A) WT (STHdh<sup>Q7/Q7</sup>) or (B) mHTT (STHdh<sup>Q111/Q111</sup>) expressing striatal neuronal cells, transfected with GFP-Rhes. GFP-Rhes induces TNT-like processes in both the cells. Arrows indicate Rhes-induced TNT-like protrusions. **(C and D)** Representative confocal image of STHdh<sup>Q111/Q111</sup> neuronal cells (expressing endogenous FL-mHTT [endo]), transfected with GFP alone (C) and immunocytochemistry performed with MAB2166 HTT antibody. **(D)** Representative confocal image of STHdh<sup>Q7/Q7</sup> striatal neuronal cells expressing GFP alone and mCherry-HTT N171-89Q (mHTT). **(E and F)** Representative confocal image of FACS-sorted BFP expressing striatal neuronal cells (acceptor cell) co-cultured with (E) GFP alone + mCherry N171-89Q or (F) GFP-Rhes + mCherry N171-89Q (double-positive cells, donor cell). Arrowheads indicate mHTT colocalized with Rhes-positive vesicle-like structures in acceptor cells. Magnified images are shown in the inset from the selected area for each panel. **(G)** Representative confocal or DIC image of primary striatal neurons, cotransfected with GFP alone (green) and mCherry N171-89Q (mHTT; red). No apparent mHTT transport was observed. Insets are shown at higher magnification in each panel.

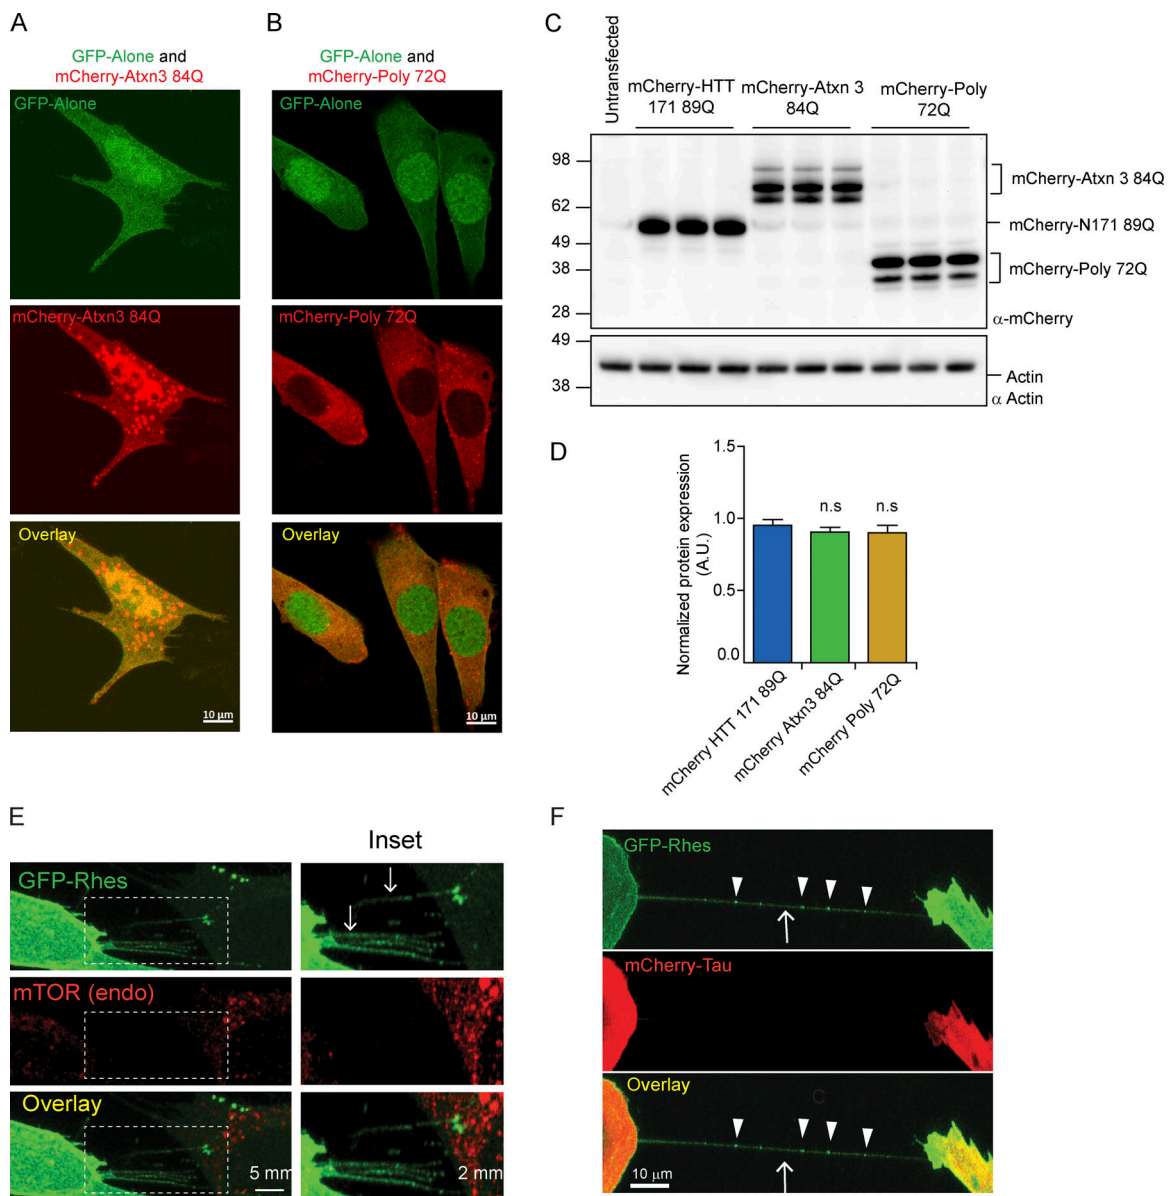

Figure S6. **Rhes tunnels are negative for mTOR and wtTau proteins.** (A and B) Representative confocal image of striatal neuronal cells, cotransfected with (A) GFP alone and mCherry-Atnx3 84Q, and (B) GFP alone and mCherry-Poly 72Q for 48 h. (C and D) Representative Western blot (C) showing the expression of mCherry-HTT 171 89Q or mCherry-Atnx3 84Q or mCherry-Poly 72Q in striatal neuronal cells after 48 h of transfection. Membrane was probed for mCherry antibody. Actin was used as loading control. (D) Quantification of the indicated proteins (normalized to actin). Bar graph shows mean  $\pm$  SEM; one-way ANOVA (n.s, not significant),  $n = 3$  independent experiments. (E) Representative image of striatal neuronal cells, expressing GFP-Rhes (green) and costained for mTOR by immunocytochemistry (red), as described in Materials and methods. Arrows indicate TNT-like protrusions. (F) Representative confocal image of striatal neuronal cells, cotransfected with GFP-Rhes and mCherry-Tau. Arrows indicate TNT-like protrusions, and arrowheads indicate GFP-Rhes-positive vesicles.

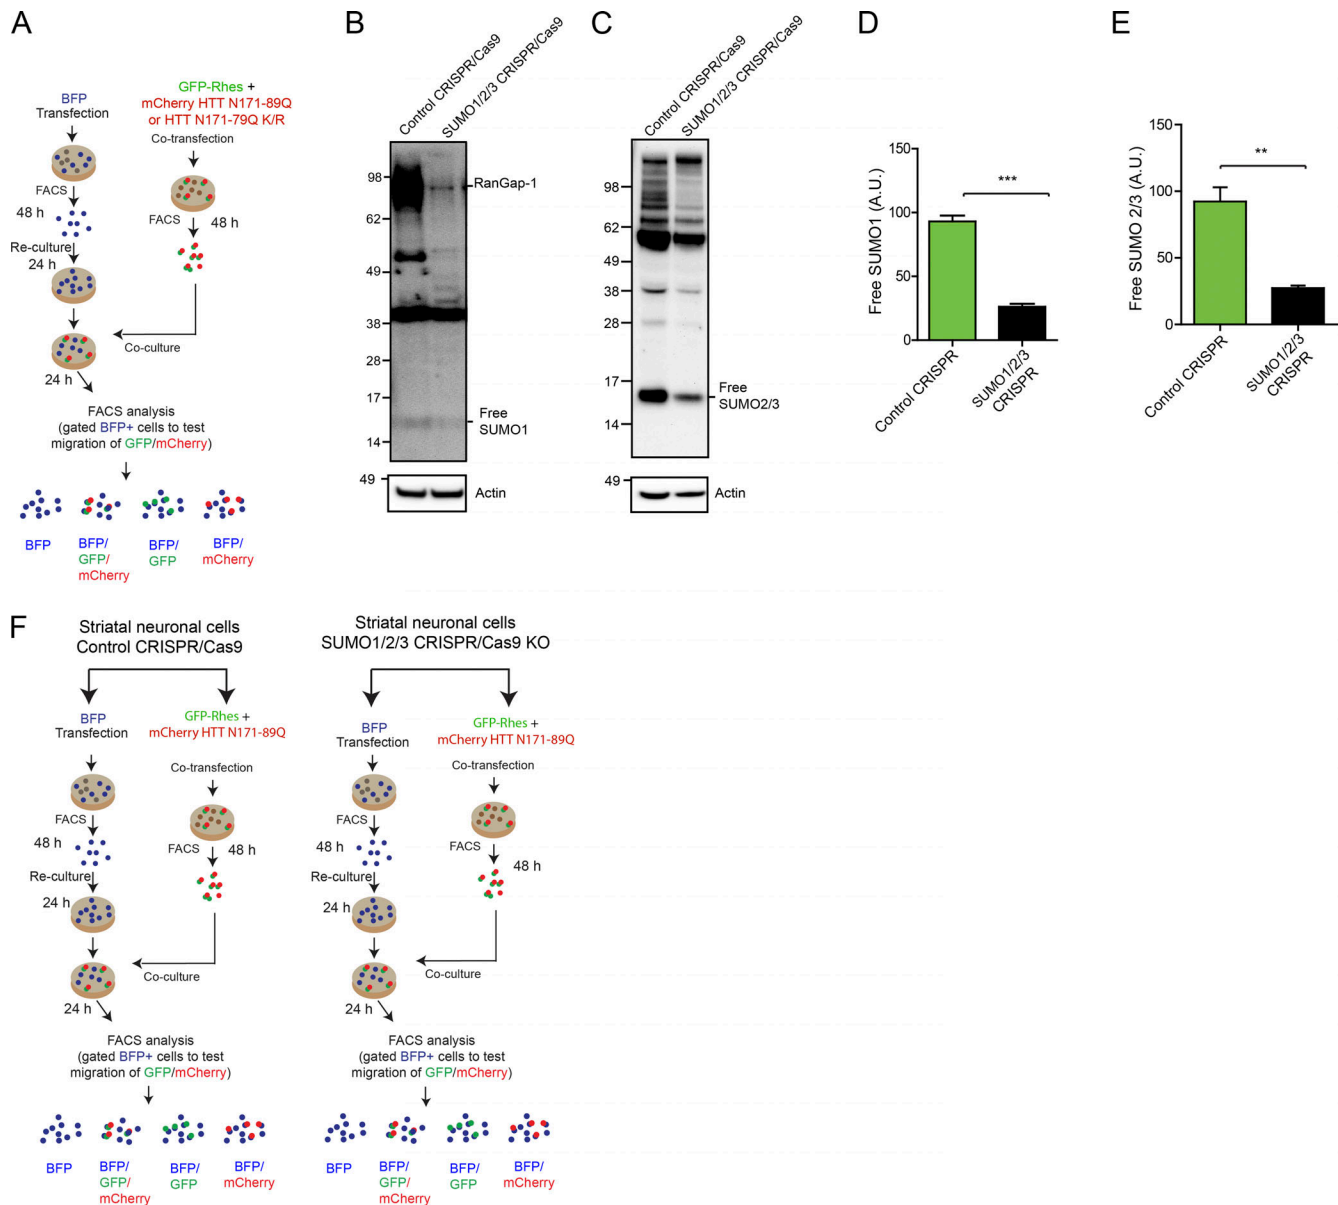

Figure S7. **The experimental design for various experiments and SUMO 1/2/3 protein depletion.** (A) Experimental design for FACS and co-culture experiments for Fig. 10, C–F. (B) Striatal neuronal cells, transfected with control CRISPR/Cas9 plasmid or SUMO1/2/3 CRISPR/Cas9 and sorted, then lysed to check SUMO1 depletion using anti-SUMO1 antibody. Western blot showing SUMO2/3 depletion in SUMO 1, 2, and 3–depleted cells. Actin was used as loading control. (D and E) Quantification of SUMO1 or SUMO2/3 protein depletion (normalized to actin) in SUMO1/2/3 KO cells versus control cells. Bar graph shows mean  $\pm$  SEM; Student's *t* test (\*\*,  $P < 0.01$ ; \*\*\*,  $P < 0.001$ ;  $n = 3$  independent experiments). (F) Experimental design for FACS and co-culture experiments (Fig. 10, G–J).

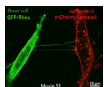

Video 1. **Striatal neuronal cells, positive for GFP-Rhes or mCherry-Farnesyl 5, were FACS-sorted and co-cultured (related to Fig. 2 B, inset, b1–b3).** The image demonstrates that the GFP-Rhes–induced TNT-like protrusion from the donor cell is connected to mCherry-Farnesyl 5 expressing the acceptor cell. Time-lapse imaging indicates the retraction of one of the TNT-like cellular protrusions, Rhes tunnels, after delivery of Rhes-positive vesicles to an acceptor cell. A total of four Z-stacks (planes) were acquired and presented as maximum intensity projection. Total time of the video file is 14 min. 29 cycles were collected at a rate of 29 s per cycle.

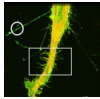

Video 2. **Striatal neuronal cells, coexpressing GFP-Rhes, and mCherry-actin were treated with DMSO for 8 h (related to Fig. 2 G).** Time-lapse imaging was performed, and a total of seven Z-stacks were collected and represented as maximum intensity projection for cells treated with DMSO. The length of the video is ~27 min (29 cycles) and 15 min (14 cycles). The interval between each period is 57–60 s.

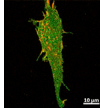

Video 3. **Striatal neuronal cells were exposed to cytochalasin D (2 µg/ml) for 8 h (related to Fig. 2 G).** Time-lapse imaging was performed as in Video 2.

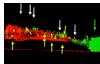

Video 4. **Deconvolved 3D animation of Fig. 3 D shows white arrows depicting GFP-Rhes vesicle-like puncta on the surface and yellow arrows depicting GFP-Rhes vesicle-like puncta inside the lumen of the cell.**

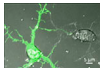

Video 5. **Time-lapse imaging was acquired in the primary striatal neuron, expressing GFP-Rhes (related to Fig 3 I).** GFP-Rhes-positive vesicle delivery to an adjacent cell (arrow in Video 6) and retraction of a TNT-like protrusion are shown in real time. A total of five Z-stacks were acquired and represented as maximum intensity projection. The length of the video is 13 min, and 22 cycles were collected with a rate of 36 s per cycle.

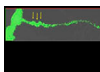

Video 6. **Animation of Video 5 (Fig. 3 I, inset) showing delivered vesicles (white arrow) and vesicles (yellow arrows) in the TNT-like Rhes tunnels.**

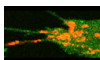

Video 7. **Time-lapse imaging was acquired in striatal neuronal cells, coexpressing GFP-Rhes and m-Cherry HTT 171 89Q (related to Fig. 6 E).** A total of four Z-stacks was collected and represented as maximum intensity projection. The length of the video is ~7 min, and five cycles were acquired at a rate of 84 s per cycle.

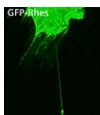

Video 8. **Time-lapse imaging was acquired in striatal neuronal cells, co-cultured with FACS-sorted GFP-Rhes and m-Cherry HTT 171 89Q and FACS-sorted cell-brite cells (related to Fig. 6 F).** A total of four Z-stacks were collected and represented as maximum intensity projection. The video is 3 min; slow motion was applied after the 13th point (for the same video), using video software Movavi.
